# Supplementary material
Source: PubMed Central journal article supplement (PMC10065988)
Supplement: NIHMS1840256-supplement-1.pdf [file NIHMS1840256-supplement-1.pdf]

# Supplemental Figure 1

## A. Day 7

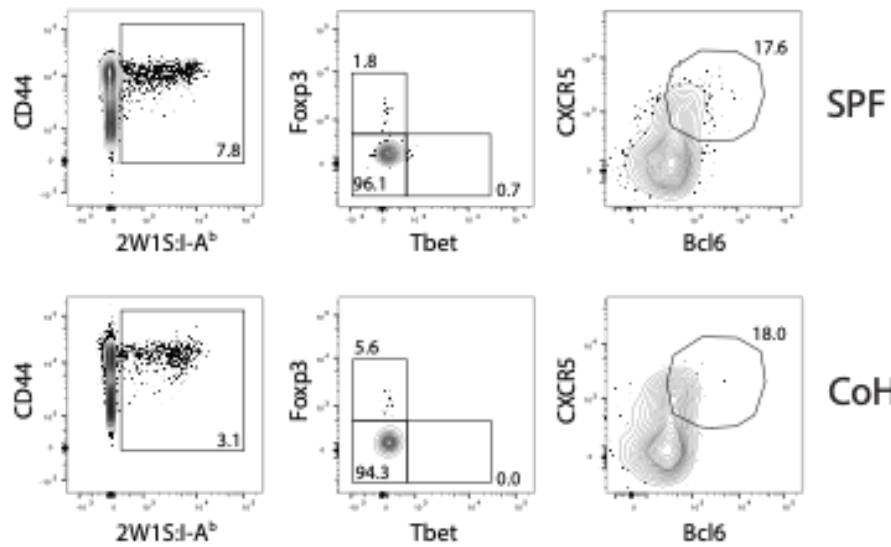

## B. Day 28

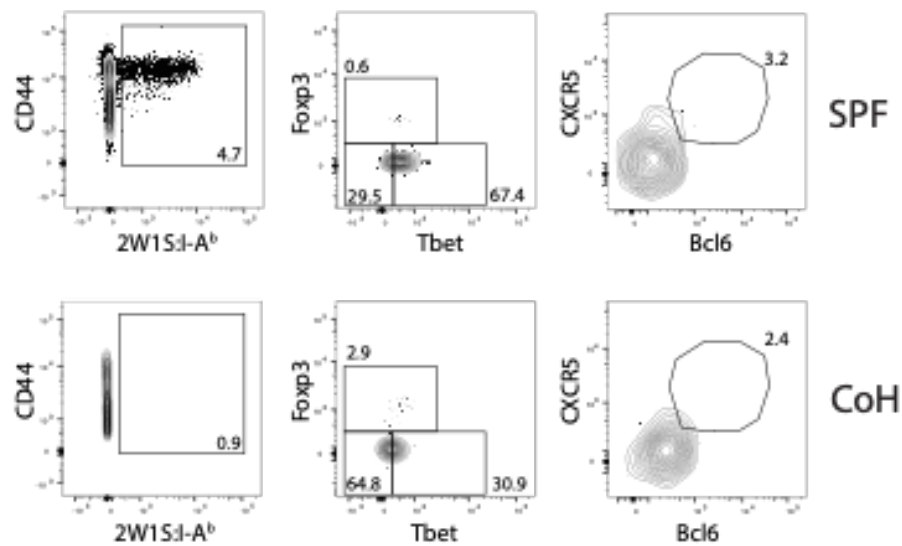

1

2 Supplemental Figure 1. Representative flow plots show the expression of Tbet,  
3 Bcl6/CXCR5, and Foxp3 in 2W1S-specific CD4 T cells after TriVax immunization.

4
